# Supplementary material
Source: PubMed Central journal article supplement (PMC4049961)
Supplement: cc-13-1248-s01.pdf [file cc-13-1248-s01.pdf]

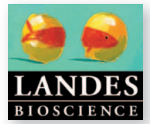

## **Supplemental Material to:**

**Tsutomu Shimura, Nobuyuki Hamada, Megumi Sasatani,  
Kenji Kamiya, and Naoki Kunugita**

**Nuclear accumulation of cyclin D1 following long-term  
fractionated exposures to low-dose ionizing radiation in  
normal human diploid cells**

**Cell Cycle 2014; 13(8)**

**<http://dx.doi.org/10.4161/cc.28139>**

**<http://www.landesbioscience.com/journals/cc/article/28139>**

Figure S1

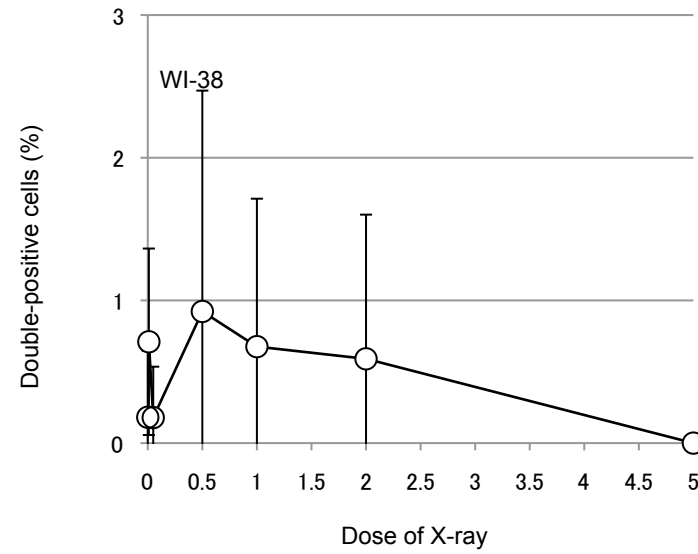

**Figure S1.** Cyclin D1 localization following SR exposure. The percentage of WI-38 cells double positive for cyclin D1 and PCNA was determined 24 h after cells were exposed to indicated doses of radiation.
